# Supplementary material
Source: PubMed Central journal article supplement (PMC2759776)

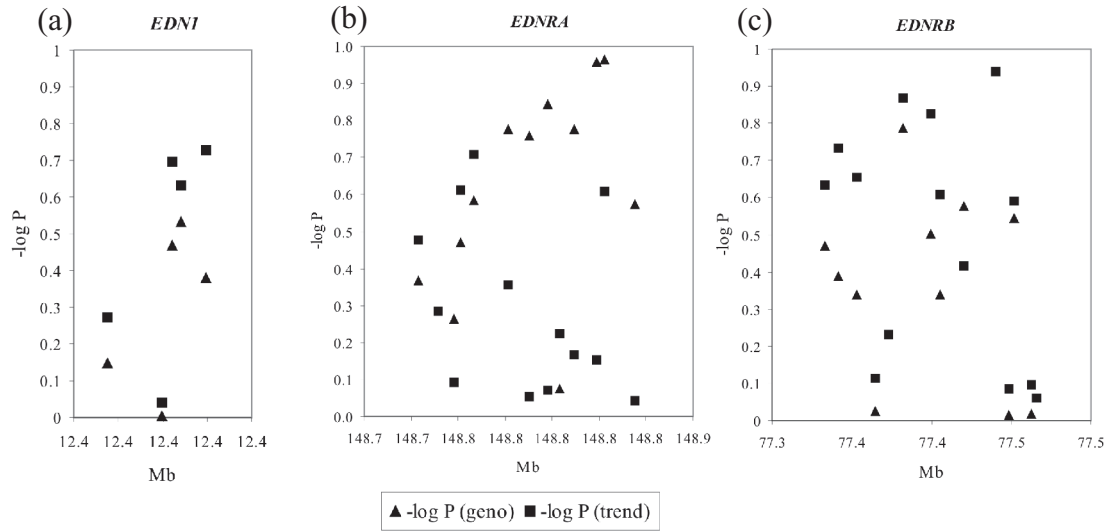

Supplemental figure 1

Supplement: NIHMS27299-supplement-Figure_S1.pdf [file NIHMS27299-supplement-Figure_S1.pdf]

*EDNRA*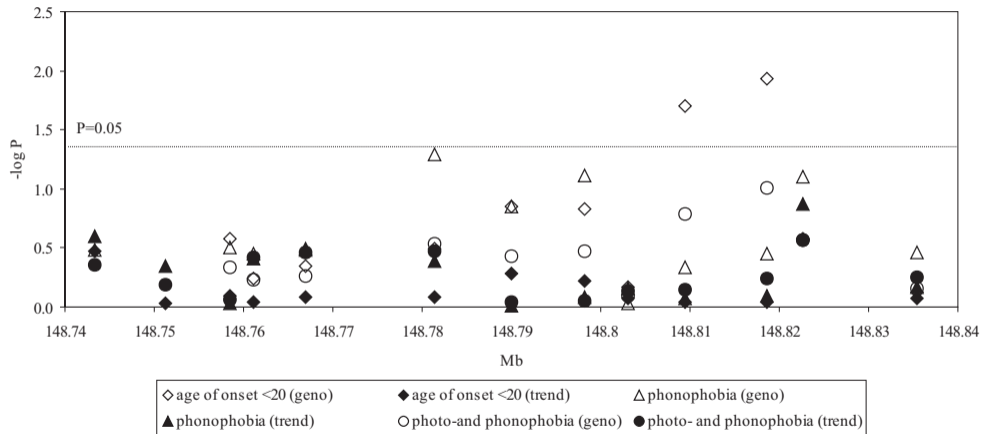

Supplemental figure 2

Supplement: NIHMS27299-supplement-Figure_S2.pdf [file NIHMS27299-supplement-Figure_S2.pdf]
